# Supplementary material for: Distinct functional and compositional properties in the gut microbiome of children with acute lymphoblastic leukaemia identified by shotgun metagenomics
Source: Springer Nature journal article supplement (doi:10.1038/s41598-025-27280-7), 2025-12-03
Supplement: MOESM1 [file 41598_2025_27280_MOESM1_ESM.xlsx]

## Sheet: Sheet 1
Study	Project_number	Sample_ID	Accession	Age	Country
CosteaPI_2017	PRJEB17632	CosteaPI_2017__alien4-11-0-0	ERR1728779;ERR1728778;ERR1728777;ERR1728776	15 yo	DEU
CosteaPI_2017	PRJEB17632	CosteaPI_2017__donald3-11-30-0	ERR1729240;ERR1729239;ERR1729238;ERR1729237;ERR1729236;ERR1728118;ERR1728117;ERR1728116;ERR1728115;ERR1728114	7 yo	DEU
CosteaPI_2017	PRJEB17632	CosteaPI_2017__donald3-11-7-0	ERR1729455;ERR1729454;ERR1729453;ERR1729452;ERR1728333;ERR1728332;ERR1728331;ERR1728330	7 yo	DEU
CosteaPI_2017	PRJEB17632	CosteaPI_2017__donald4-11-7-0	ERR1729349;ERR1729348;ERR1729347;ERR1729346;ERR1728227;ERR1728226;ERR1728225;ERR1728224	7 yo	DEU
CosteaPI_2017	PRJEB17632	CosteaPI_2017__donald5-11-30-0	ERR1729447;ERR1729446;ERR1729445;ERR1729444;ERR1728325;ERR1728324;ERR1728323;ERR1728322	8 yo	DEU
CosteaPI_2017	PRJEB17632	CosteaPI_2017__donald5-11-7-0	ERR1729498;ERR1729497;ERR1729496;ERR1729495;ERR1728376;ERR1728375;ERR1728374;ERR1728373	8 yo	DEU
CosteaPI_2017	PRJEB17632	CosteaPI_2017__mickey3-11-7-0	ERR1729293;ERR1729292;ERR1729291;ERR1729290;ERR1729289;ERR1728171;ERR1728170;ERR1728169;ERR1728168;ERR1728167	6 yo	DEU
CosteaPI_2017	PRJEB17632	CosteaPI_2017__mickey4-11-30-0	ERR1729228;ERR1729227;ERR1729226;ERR1729225;ERR1729224;ERR1728106;ERR1728105;ERR1728104;ERR1728103;ERR1728102	6 yo	DEU
CosteaPI_2017	PRJEB17632	CosteaPI_2017__mickey4-11-7-0	ERR1729161;ERR1729160;ERR1729159;ERR1729158;ERR1728039;ERR1728038;ERR1728037;ERR1728036	6 yo	DEU
CosteaPI_2017	PRJEB17632	CosteaPI_2017__mickey5-11-7-0	ERR1729435;ERR1729434;ERR1729433;ERR1729432;ERR1728313;ERR1728312;ERR1728311;ERR1728310	4 yo	DEU
CosteaPI_2017	PRJEB17632	CosteaPI_2017__peacemaker3-11-0-0	ERR1729165;ERR1729164;ERR1729163;ERR1729162;ERR1728043;ERR1728042;ERR1728041;ERR1728040	7 yo	DEU
CosteaPI_2017	PRJEB17632	CosteaPI_2017__pluto3-11-0-0	ERR1729235;ERR1729234;ERR1729233;ERR1729232;ERR1728113;ERR1728112;ERR1728111;ERR1728110	6 yo	DEU
DeFilippis_2019	PRJNA706116	DeFilippis_2019__C10	SRR13837294	age range 48–84 months	ITA
DeFilippis_2019	PRJNA706116	DeFilippis_2019__C11	SRR13837293	age range 48–84 months	ITA
DeFilippis_2019	PRJNA706116	DeFilippis_2019__C12	SRR13837291	age range 48–84 months	ITA
DeFilippis_2019	PRJNA706116	DeFilippis_2019__C13	SRR13837290	age range 48–84 months	ITA
DeFilippis_2019	PRJNA706116	DeFilippis_2019__C14	SRR13837289	age range 48–84 months	ITA
DeFilippis_2019	PRJNA706116	DeFilippis_2019__C15	SRR13837288	age range 48–84 months	ITA
DeFilippis_2019	PRJNA706116	DeFilippis_2019__C16	SRR13837287	age range 48–84 months	ITA
DeFilippis_2019	PRJNA706116	DeFilippis_2019__C17	SRR13837286	age range 48–84 months	ITA
DeFilippis_2019	PRJNA706116	DeFilippis_2019__C18	SRR13837285	age range 48–84 months	ITA
DeFilippis_2019	PRJNA706116	DeFilippis_2019__C19	SRR13837284	age range 48–84 months	ITA
DeFilippis_2019	PRJNA706116	DeFilippis_2019__C1	SRR13837295	age range 48–84 months	ITA
DeFilippis_2019	PRJNA706116	DeFilippis_2019__C20	SRR13837282	age range 48–84 months	ITA
DeFilippis_2019	PRJNA706116	DeFilippis_2019__C21	SRR13837394	age range 48–84 months	ITA
DeFilippis_2019	PRJNA706116	DeFilippis_2019__C22	SRR13837393	age range 48–84 months	ITA
DeFilippis_2019	PRJNA706116	DeFilippis_2019__C23	SRR13837392	age range 48–84 months	ITA
DeFilippis_2019	PRJNA706116	DeFilippis_2019__C24	SRR13837391	age range 48–84 months	ITA
DeFilippis_2019	PRJNA706116	DeFilippis_2019__C25	SRR13837390	age range 48–84 months	ITA
DeFilippis_2019	PRJNA706116	DeFilippis_2019__C26	SRR13837389	age range 48–84 months	ITA
DeFilippis_2019	PRJNA706116	DeFilippis_2019__C28	SRR13837388	age range 48–84 months	ITA
DeFilippis_2019	PRJNA706116	DeFilippis_2019__C29	SRR13837387	age range 48–84 months	ITA
DeFilippis_2019	PRJNA706116	DeFilippis_2019__C2	SRR13837283	age range 48–84 months	ITA
DeFilippis_2019	PRJNA706116	DeFilippis_2019__C30	SRR13837385	age range 48–84 months	ITA
DeFilippis_2019	PRJNA706116	DeFilippis_2019__C3	SRR13837386	age range 48–84 months	ITA
DeFilippis_2019	PRJNA706116	DeFilippis_2019__C4	SRR13837383	age range 48–84 months	ITA
DeFilippis_2019	PRJNA706116	DeFilippis_2019__C5	SRR13837382	age range 48–84 months	ITA
DeFilippis_2019	PRJNA706116	DeFilippis_2019__C6	SRR13837381	age range 48–84 months	ITA
DeFilippis_2019	PRJNA706116	DeFilippis_2019__C7	SRR13837380	age range 48–84 months	ITA
DeFilippis_2019	PRJNA706116	DeFilippis_2019__C8	SRR13837379	age range 48–84 months	ITA
DeFilippis_2019	PRJNA706116	DeFilippis_2019__C9	SRR13837378	age range 48–84 months	ITA
IjazUS_2017	PRJEB18780	IjazUS_2017_S117_H	ERS1491622	8 yo	GBR
IjazUS_2017	PRJEB18780	IjazUS_2017_S119_H	ERS1491627	5 yo	GBR
IjazUS_2017	PRJEB18780	IjazUS_2017_S130_H	ERS1491653	7 yo	GBR
IjazUS_2017	PRJEB18780	IjazUS_2017_S132_H	ERS1491658	8 yo	GBR
IjazUS_2017	PRJEB18780	IjazUS_2017_S134_H	ERS1491663	11 yo	GBR
IjazUS_2017	PRJEB18780	IjazUS_2017_S138_H	ERS1491674	13 yo	GBR
IjazUS_2017	PRJEB18780	IjazUS_2017_S139_H	ERS1491678	13 yo	GBR
IjazUS_2017	PRJEB18780	IjazUS_2017_S140_H	ERS1491681	16 yo	GBR
IjazUS_2017	PRJEB18780	IjazUS_2017_S142_H	ERS1491687	10 yo	GBR
IjazUS_2017	PRJEB18780	IjazUS_2017_S144_H	ERS1491693	12 yo	GBR
IjazUS_2017	PRJEB18780	IjazUS_2017_S146_H	ERS1491699	14 yo	GBR
IjazUS_2017	PRJEB18780	IjazUS_2017_S73_H	ERS1491505	10 yo	GBR
AsnicarF_2017	PRJNA339914	MV_FEI1_t1Q14	SRR4052021	age range 3-10 months	ITA
AsnicarF_2017	PRJNA339915	MV_FEI2_t1Q14	SRR4052022	age range 3-10 months	ITA
AsnicarF_2017	PRJNA339916	MV_FEI3_t1Q14	SRR4052033	age range 3-10 months	ITA
AsnicarF_2017	PRJNA339917	MV_FEI4_t1Q14	SRR4052038	age range 3-10 months	ITA
AsnicarF_2017	PRJNA339918	MV_FEI4_t2Q15	SRR4052039	age range 3-10 months	ITA
AsnicarF_2017	PRJNA339919	MV_FEI5_t1Q14	SRR4052040	age range 3-10 months	ITA
AsnicarF_2017	PRJNA339920	MV_FEI5_t2Q14	SRR4052041	age range 3-10 months	ITA
AsnicarF_2017	PRJNA339921	MV_FEI5_t3Q15	SRR4052042	age range 3-10 months	ITA
Scicchitano_2024	PRJEB73511	Scicchitano_2024__A03T0	ERR13710794	age range 9-14 years	ITA
Scicchitano_2024	PRJEB73511	Scicchitano_2024__A05T0	ERR13710796	age range 9-14 years	ITA
Scicchitano_2024	PRJEB73511	Scicchitano_2024__A09T0	ERR13710798	age range 9-14 years	ITA
Scicchitano_2024	PRJEB73511	Scicchitano_2024__M02T0	ERR13710827	age range 9-14 years	ITA
Scicchitano_2024	PRJEB73511	Scicchitano_2024__M08T0	ERR13710829	age range 9-14 years	ITA
Scicchitano_2024	PRJEB73511	Scicchitano_2024__PT01T0	ERR13710831	age range 9-14 years	ITA
Scicchitano_2024	PRJEB73511	Scicchitano_2024__PT01T1	ERR13710832	age range 9-14 years	ITA
Scicchitano_2024	PRJEB73511	Scicchitano_2024__PT03T0	ERR13710833	age range 9-14 years	ITA
Scicchitano_2024	PRJEB73511	Scicchitano_2024__PT03T1	ERR13710834	age range 9-14 years	ITA
Scicchitano_2024	PRJEB73511	Scicchitano_2024__PT04T0	ERR13710835	age range 9-14 years	ITA
Scicchitano_2024	PRJEB73511	Scicchitano_2024__PT04T1	ERR13710836	age range 9-14 years	ITA
Scicchitano_2024	PRJEB73511	Scicchitano_2024__PT05T0	ERR13710837	age range 9-14 years	ITA
Scicchitano_2024	PRJEB73511	Scicchitano_2024__PT05T1	ERR13710838	age range 9-14 years	ITA
Scicchitano_2024	PRJEB73511	Scicchitano_2024__PT07T0	ERR13710839	age range 9-14 years	ITA
Scicchitano_2024	PRJEB73511	Scicchitano_2024__PT07T1	ERR13710840	age range 9-14 years	ITA
BackhedF_2015	PRJEB6460	SID10_12M	ERR525688	12 months	SWE
BackhedF_2015	PRJEB6464	SID103_12M	ERR525689	12 months	SWE
BackhedF_2015	PRJEB6468	SID105_12M	ERR525694	12 months	SWE
BackhedF_2015	PRJEB6456	SID1_12M	ERR525700	12 months	SWE
BackhedF_2015	PRJEB6472	SID12_12M	ERR525701	12 months	SWE
BackhedF_2015	PRJEB6476	SID128_12M	ERR525703	12 months	SWE
BackhedF_2015	PRJEB6480	SID130_12M	ERR525709	12 months	SWE
BackhedF_2015	PRJEB6484	SID133_12M	ERR525713	12 months	SWE
BackhedF_2015	PRJEB6488	SID137_12M	ERR525717	12 months	SWE
BackhedF_2015	PRJEB6492	SID150_12M	ERR525722	12 months	SWE
BackhedF_2015	PRJEB6496	SID157_12M	ERR525726	12 months	SWE
BackhedF_2015	PRJEB6500	SID172_12M	ERR525730	12 months	SWE
BackhedF_2015	PRJEB6504	SID179_12M	ERR525734	12 months	SWE
BackhedF_2015	PRJEB6512	SID180_12M	ERR525738	12 months	SWE
BackhedF_2015	PRJEB6516	SID181_12M	ERR525742	12 months	SWE
BackhedF_2015	PRJEB6508	SID18_12M	ERR525743	12 months	SWE
BackhedF_2015	PRJEB6520	SID184_12M	ERR525747	12 months	SWE
BackhedF_2015	PRJEB6524	SID195_12M	ERR525754	12 months	SWE
BackhedF_2015	PRJEB6528	SID201_12M	ERR525760	12 months	SWE
BackhedF_2015	PRJEB6532	SID203_12M	ERR525764	12 months	SWE
BackhedF_2015	PRJEB6536	SID224_12M	ERR525768	12 months	SWE
BackhedF_2015	PRJEB6540	SID229_12M	ERR525772	12 months	SWE
BackhedF_2015	PRJEB6544	SID238_12M	ERR525776	12 months	SWE
BackhedF_2015	PRJEB6548	SID240_12M	ERR525780	12 months	SWE
BackhedF_2015	PRJEB6552	SID241_12M	ERR525784	12 months	SWE
BackhedF_2015	PRJEB6556	SID244_12M	ERR525788	12 months	SWE
BackhedF_2015	PRJEB6560	SID256_12M	ERR525792	12 months	SWE
BackhedF_2015	PRJEB6564	SID258_12M	ERR525796	12 months	SWE
BackhedF_2015	PRJEB6568	SID26_12M	ERR525800	12 months	SWE
BackhedF_2015	PRJEB6572	SID263_12M	ERR525801	12 months	SWE
BackhedF_2015	PRJEB6576	SID265_12M	ERR525806	12 months	SWE
BackhedF_2015	PRJEB6580	SID268_12M	ERR525810	12 months	SWE
BackhedF_2015	PRJEB6584	SID272_12M	ERR525816	12 months	SWE
BackhedF_2015	PRJEB6588	SID274_12M	ERR525820	12 months	SWE
BackhedF_2015	PRJEB6592	SID275_12M	ERR525824	12 months	SWE
BackhedF_2015	PRJEB6596	SID276_12M	ERR525828	12 months	SWE
BackhedF_2015	PRJEB6600	SID281_12M	ERR525832	12 months	SWE
BackhedF_2015	PRJEB6604	SID282_12M	ERR525836	12 months	SWE
BackhedF_2015	PRJEB6608	SID326_12M	ERR525840	12 months	SWE
BackhedF_2015	PRJEB6612	SID332_12M	ERR525844	12 months	SWE
BackhedF_2015	PRJEB6616	SID335_12M	ERR525848	12 months	SWE
BackhedF_2015	PRJEB6620	SID338_12M	ERR525852	12 months	SWE
BackhedF_2015	PRJEB6624	SID341_12M	ERR525856	12 months	SWE
BackhedF_2015	PRJEB6628	SID343_12M	ERR525860	12 months	SWE
BackhedF_2015	PRJEB6632	SID345_12M	ERR525864	12 months	SWE
BackhedF_2015	PRJEB6636	SID350_12M	ERR525868	12 months	SWE
BackhedF_2015	PRJEB6640	SID367_12M	ERR525872	12 months	SWE
BackhedF_2015	PRJEB6644	SID377_12M	ERR525876	12 months	SWE
BackhedF_2015	PRJEB6648	SID38_12M	ERR525880	12 months	SWE
BackhedF_2015	PRJEB6652	SID383_12M	ERR525881	12 months	SWE
BackhedF_2015	PRJEB6656	SID385_12M	ERR525886	12 months	SWE
BackhedF_2015	PRJEB6660	SID387_12M	ERR525890	12 months	SWE
BackhedF_2015	PRJEB6664	SID39_12M	ERR525896	12 months	SWE
BackhedF_2015	PRJEB6668	SID397_12M	ERR525898	12 months	SWE
BackhedF_2015	PRJEB6672	SID42_12M	ERR525904	12 months	SWE
BackhedF_2015	PRJEB6676	SID45_12M	ERR525908	12 months	SWE
BackhedF_2015	PRJEB6680	SID503_12M	ERR525912	12 months	SWE
BackhedF_2015	PRJEB6684	SID504_12M	ERR525916	12 months	SWE
BackhedF_2015	PRJEB6688	SID507_12M	ERR525920	12 months	SWE
BackhedF_2015	PRJEB6696	SID511_12M	ERR525924	12 months	SWE
BackhedF_2015	PRJEB6692	SID51_12M	ERR525925	12 months	SWE
BackhedF_2015	PRJEB6700	SID521_12M	ERR525932	12 months	SWE
BackhedF_2015	PRJEB6704	SID526_12M	ERR525936	12 months	SWE
BackhedF_2015	PRJEB6708	SID527_12M	ERR525940	12 months	SWE
BackhedF_2015	PRJEB6712	SID53_12M	ERR525944	12 months	SWE
BackhedF_2015	PRJEB6716	SID532_12M	ERR525945	12 months	SWE
BackhedF_2015	PRJEB6720	SID536_12M	ERR525950	12 months	SWE
BackhedF_2015	PRJEB6724	SID544_12M	ERR525956	12 months	SWE
BackhedF_2015	PRJEB6728	SID546_12M	ERR525960	12 months	SWE
BackhedF_2015	PRJEB6732	SID549_12M	ERR525964	12 months	SWE
BackhedF_2015	PRJEB6736	SID560_12M	ERR525968	12 months	SWE
BackhedF_2015	PRJEB6740	SID565_12M	ERR525972	12 months	SWE
BackhedF_2015	PRJEB6744	SID566_12M	ERR525976	12 months	SWE
BackhedF_2015	PRJEB6748	SID567_12M	ERR525980	12 months	SWE
BackhedF_2015	PRJEB6752	SID570_12M	ERR525984	12 months	SWE
BackhedF_2015	PRJEB6756	SID572_12M	ERR525988	12 months	SWE
BackhedF_2015	PRJEB6760	SID577_12M	ERR525992	12 months	SWE
BackhedF_2015	PRJEB6764	SID582_12M	ERR525996	12 months	SWE
BackhedF_2015	PRJEB6768	SID585_12M	ERR526000	12 months	SWE
BackhedF_2015	PRJEB6772	SID587_12M	ERR526004	12 months	SWE
BackhedF_2015	PRJEB6776	SID589_12M	ERR526008	12 months	SWE
BackhedF_2015	PRJEB6780	SID590_12M	ERR526012	12 months	SWE
BackhedF_2015	PRJEB6784	SID591_12M	ERR526016	12 months	SWE
BackhedF_2015	PRJEB6788	SID598_12M	ERR526020	12 months	SWE
BackhedF_2015	PRJEB6792	SID599_12M	ERR526024	12 months	SWE
BackhedF_2015	PRJEB6796	SID608_12M	ERR526028	12 months	SWE
BackhedF_2015	PRJEB6800	SID615_12M	ERR526032	12 months	SWE
BackhedF_2015	PRJEB6804	SID622_12M	ERR526036	12 months	SWE
BackhedF_2015	PRJEB6808	SID624_12M	ERR526040	12 months	SWE
BackhedF_2015	PRJEB6812	SID626_12M	ERR526044	12 months	SWE
BackhedF_2015	PRJEB6816	SID633_12M	ERR526048	12 months	SWE
BackhedF_2015	PRJEB6820	SID635_12M	ERR526052	12 months	SWE
BackhedF_2015	PRJEB6824	SID637_12M	ERR526056	12 months	SWE
BackhedF_2015	PRJEB6828	SID640_12M	ERR526060	12 months	SWE
BackhedF_2015	PRJEB6836	SID70_12M	ERR526064	12 months	SWE
BackhedF_2015	PRJEB6832	SID7_12M	ERR526068	12 months	SWE
BackhedF_2015	PRJEB6840	SID78_12M	ERR526070	12 months	SWE
BackhedF_2015	PRJEB6844	SID82_12M	ERR526076	12 months	SWE
BackhedF_2015	PRJEB6848	SID87_12M	ERR526080	12 months	SWE
BackhedF_2015	PRJEB6852	SID9_12M	ERR526084	12 months	SWE
Supplementary Table 1. Sequence accession number and metadata of the healthy control (HC) cohort
Table containing metadata of the 176 publicly available shotgun metagenomes from children across Europe, used as the control HC for the study.
